# Supplementary material
Source: PubMed Central journal article supplement (PMC8661070)
Supplement: ijcep0014-1069-f7.pdf [file ijcep0014-1069-f7.pdf]

# Thrombosis and vasculitis in gastrointestinal tract COVID19

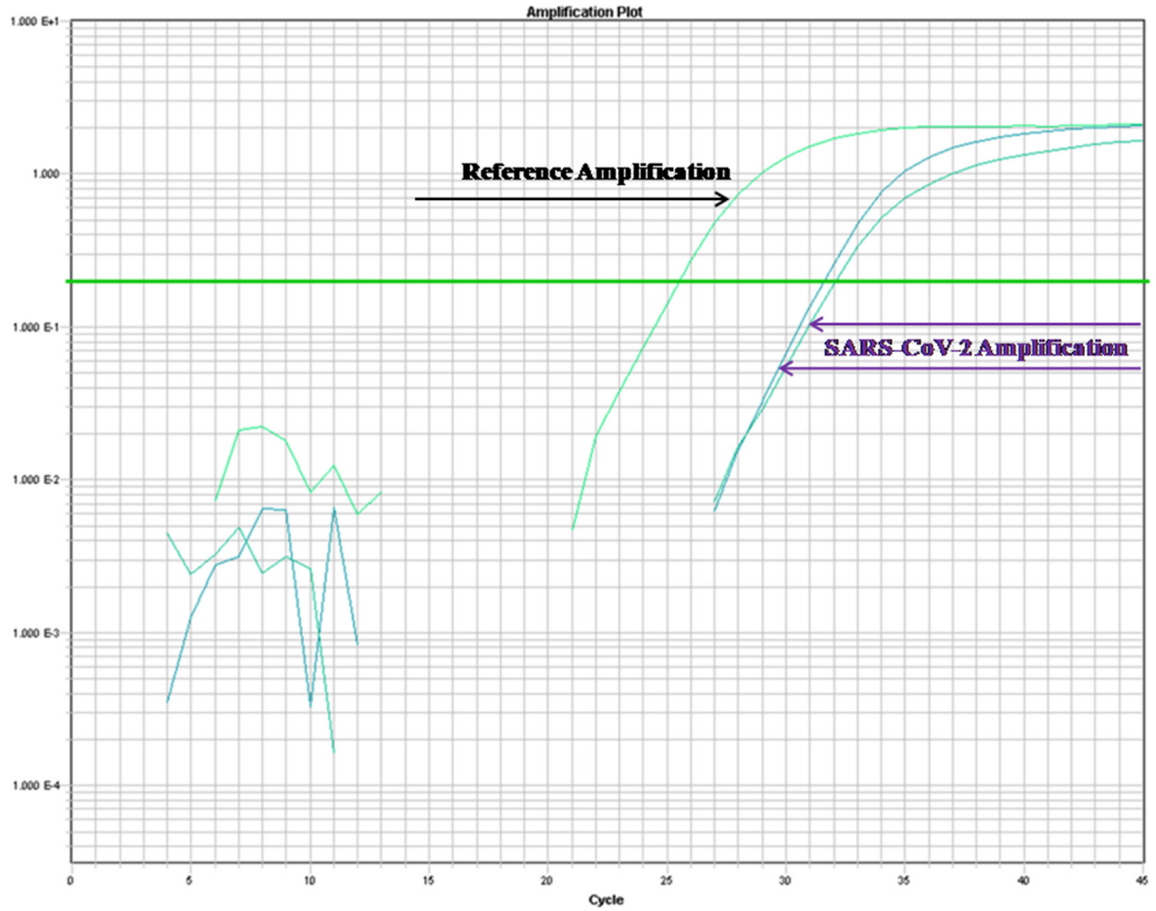

Supplementary Figure 1. SARS-CoV-2 RNA was detected from bowel tissue from Case 2.
